# Supplementary material for: Linear Energy Transfer-Dependent Change in Rice Gene Expression Profile after Heavy-Ion Beam Irradiation
Source: PubMed Central journal article supplement (PMC4962992; doi:10.1371/journal.pone.0160061), 2016-07-27

B

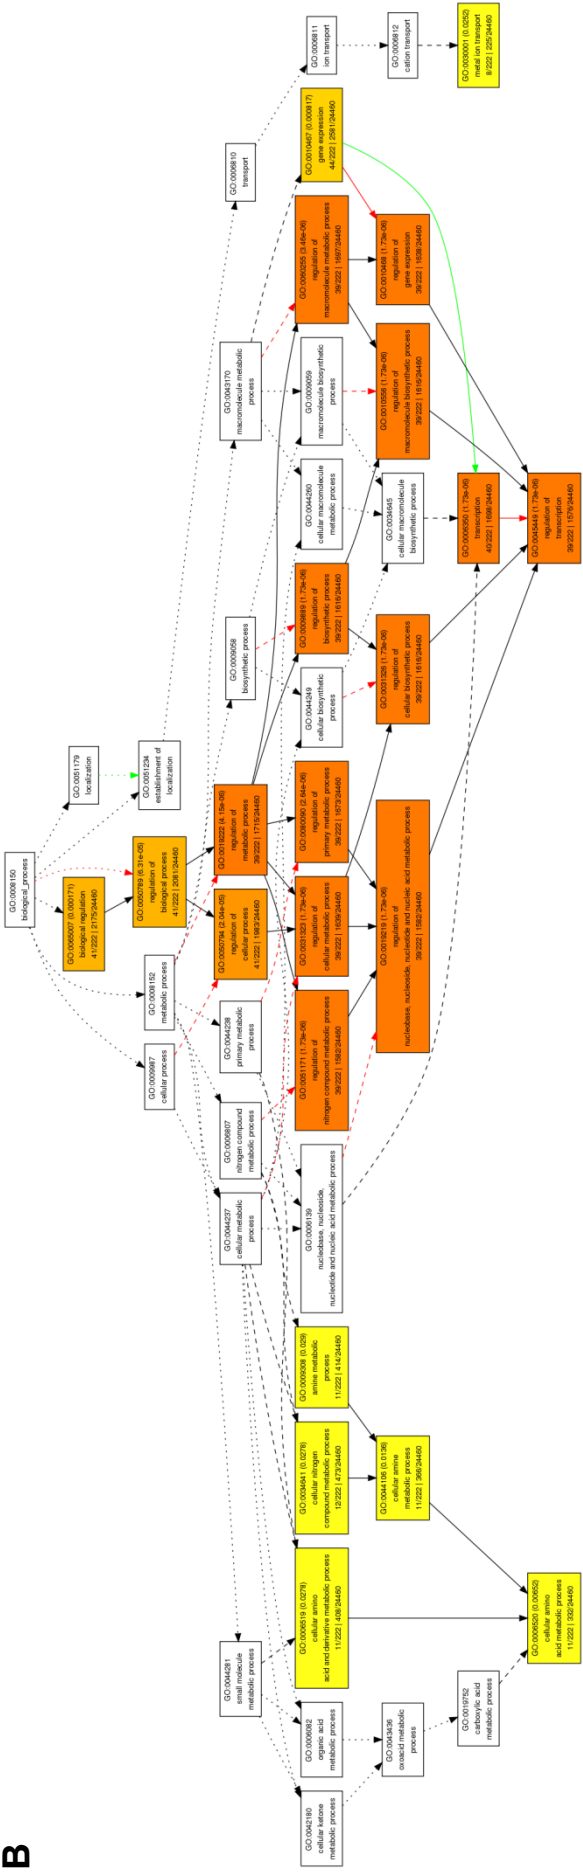

Significance levels

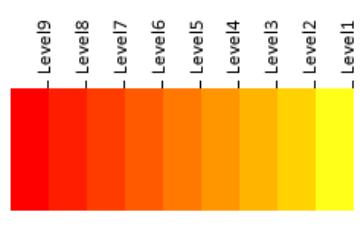

Supplement: pone.0160061.s001.pdf [file pone.0160061.s001.pdf]
