# Supplementary material for: Linear Energy Transfer-Dependent Change in Rice Gene Expression Profile after Heavy-Ion Beam Irradiation
Source: PubMed Central journal article supplement (PMC4962992; doi:10.1371/journal.pone.0160061), 2016-07-27

**A**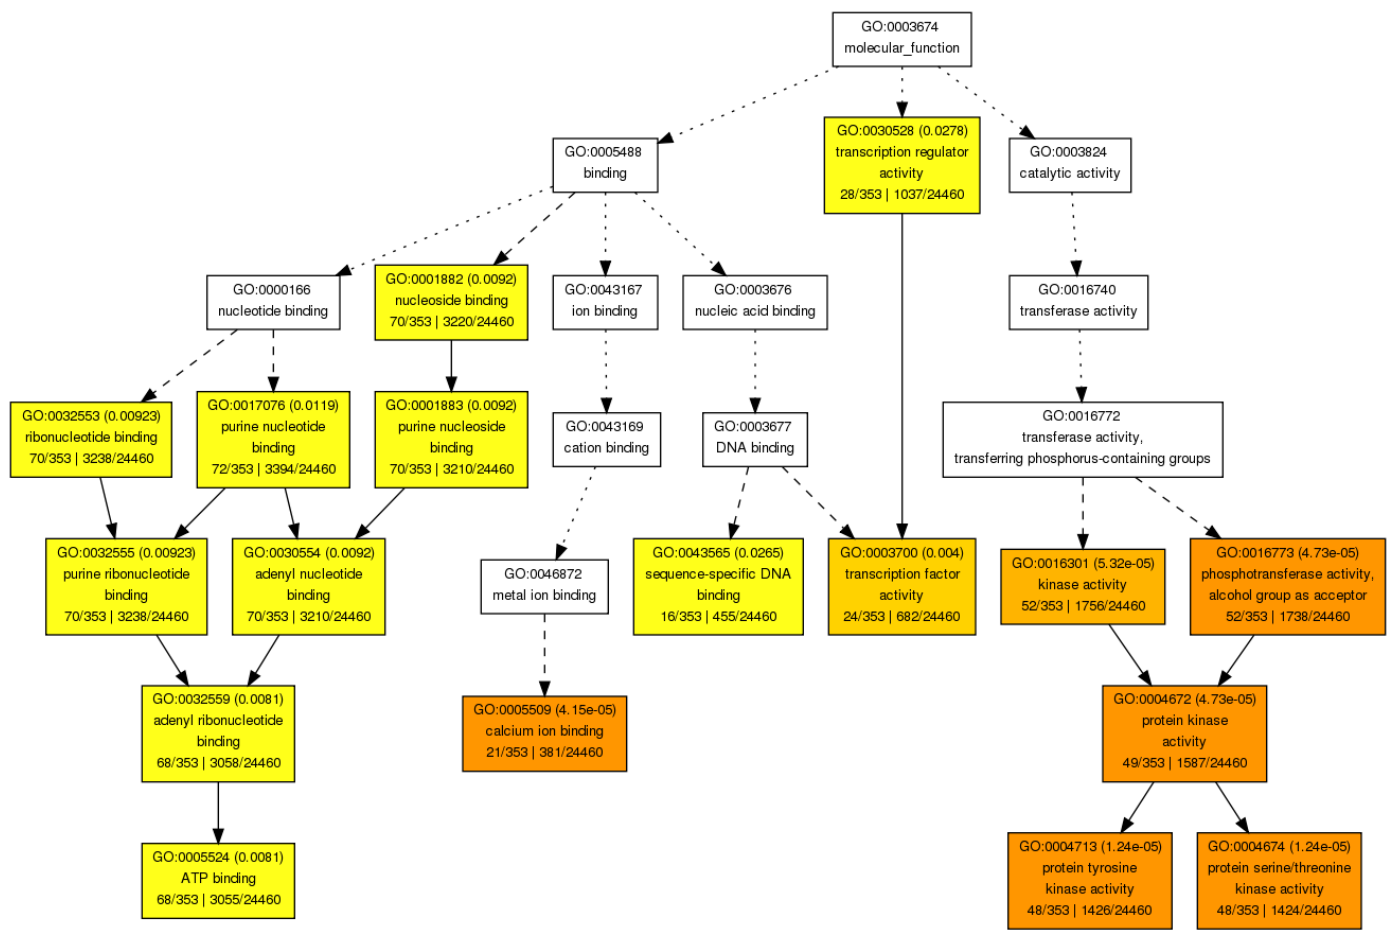**Significance levels**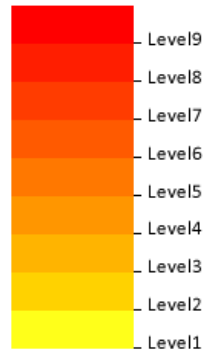



C

GO:0005575  
cellular\_component

GO:0005623  
cell

GO:0044464  
cell part

GO:0016020 (0.0213)  
membrane  
52/353 | 2185/24460

Significance levels

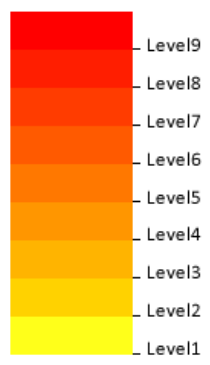

Supplement: pone.0160061.s002.pdf [file pone.0160061.s002.pdf]
